# Supplementary material for: Temperature-dependent compatibility study on halide solid-state electrolytes in solid-state batteries
Source: Front Chem. 2022 Aug 3;10:952875. doi: 10.3389/fchem.2022.952875 (PMC9382350; doi:10.3389/fchem.2022.952875)
Supplement: Supplementary file 1 [file DataSheet1.docx]

Supplementary Material

**Table S1.** Used reference patterns for qualitative phase analysis

| Phase | PDF number |
| --- | --- |
| LiCoO2 | PDF#50-0653 |
| LiFePO4 | PDF#83-2092 |
| LiMn2O4 | PDF#88-1749 |
| Li0.51Ni1.16O2 | PDF#70-3274 |
| Li0.99Ni0.01NiO2 | PDF#85-1967 |
| LiNi0.5Mn1.5O4 | PDF#80-2162 |
| Graphite | PDF#89-8487 |
| Li4Ti5O12 | PDF#49-0207 |
| Li3InCl6 | PDF#70-3274 |
| Li2OHCl | PDF#52-1159 |
| LiTi2(PO4)3 | PDF#35-0754 |
| Li10GeP2S12 | PDF#024-8307 |
| Li0.06NiO2 | PDF#49-0035 |
| InOCl | PDF#73-1560 |
| LiCl | PDF#04-0664 |
| LiOH | PDF#32-0564 |
| LiO | PDF#74-0115 |
| In2O3 | PDF#06-0416 |
| Li3PO4 | PDF#48-0956 |
| AlPO4 | PDF#45-0509 |
| Li2S | PDF#23-0369 |
| GeP5 | PDF#24-0455 |

**
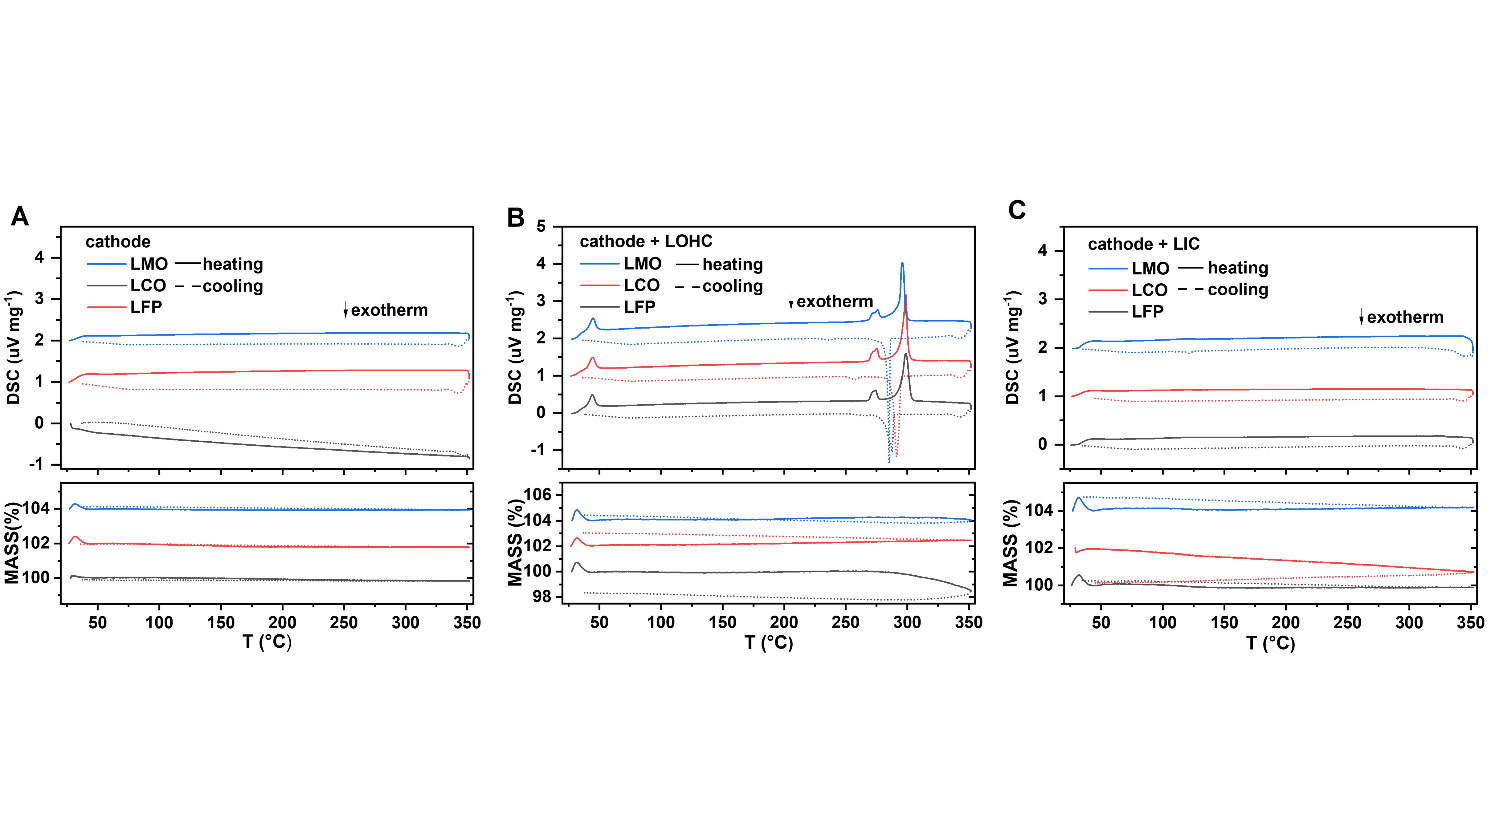
**. **FIGURE S1.** DSC and TG results of cathode (A), Cathode/LOHC mixtures (B) and Cathode/LIC mixtures (C). DSC signal offset: 1 unit (for LCO); 2 units (for LMO). TG signal offset: 2 units (for LCO) and 4 units (for LMO).


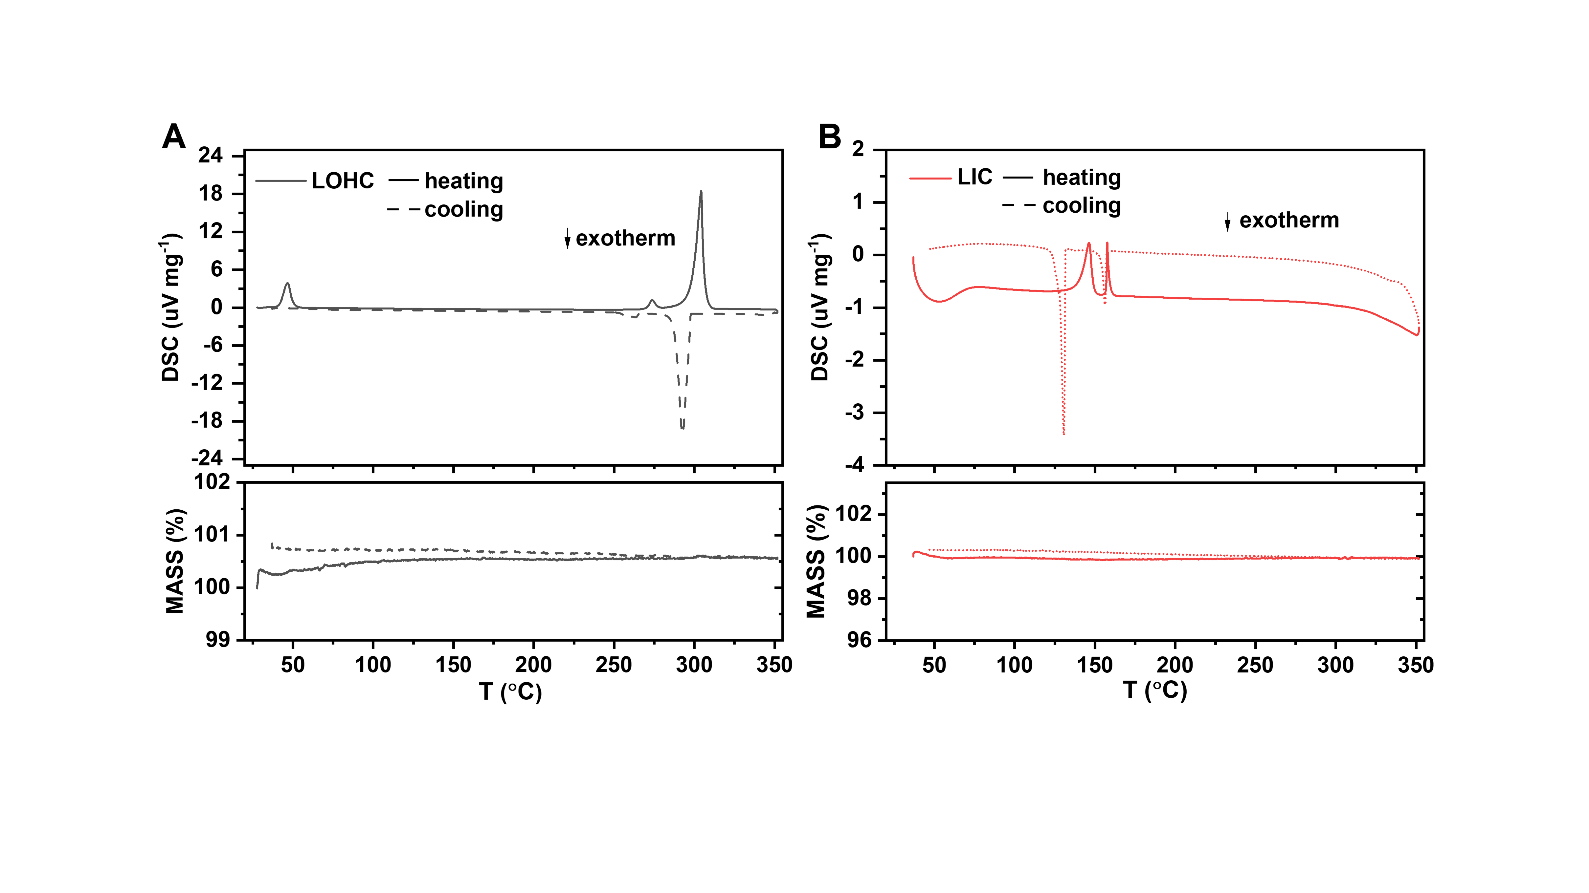


**FIGURE S2**. DSC and TG results of Li2OHCl (A), Li3InCl6 (B)

**
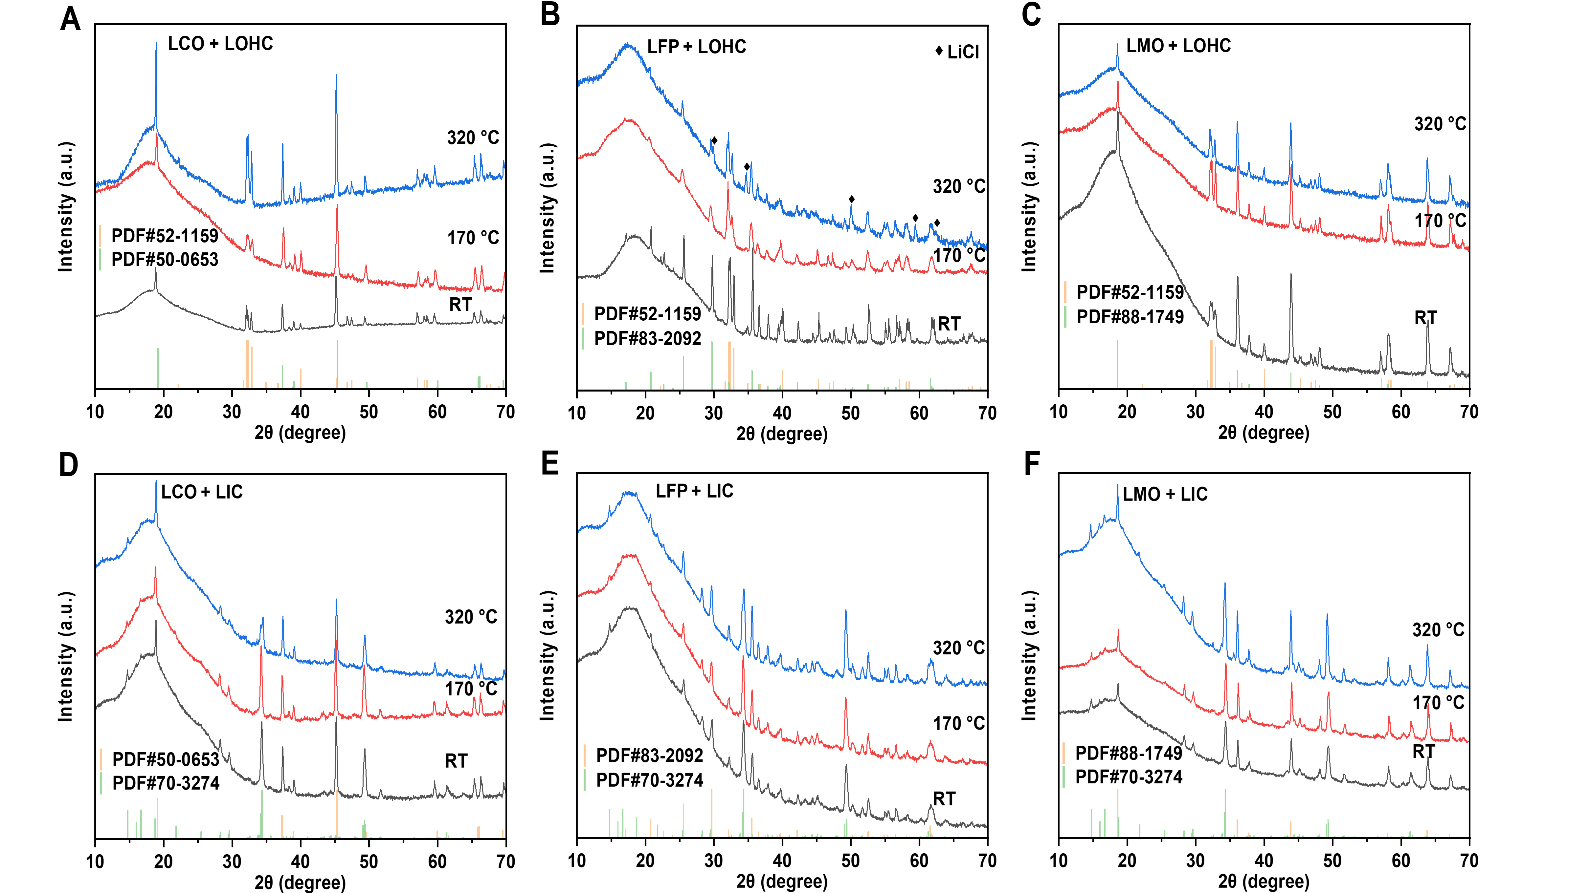
**

**FIGURE S3**. XRD patterns of LCO/LOHC (A), LFP/LOHC (B), LMO/LOHC (C), LCO/LIC (D), LFP/LIC (E), LMO/LIC (F) mixtures that were sintered at 170, 320 °C and mixed powder at room temperature. Table S1 lists the consulted reference patterns.
